# Supplementary material
Source: Royal Society of Chemistry journal article supplement (doi:10.1039/d6nj00359a)
Supplement: d6nj00359a1.pdf [file d6nj00359a1.pdf]

## **Boosting Electrocatalytic Durability and Full Water Splitting**

### **Efficiency of CoMoO<sub>4</sub> via Strategic CeO<sub>2</sub> decoration**

Tengfei Li, Zhirong Cao, Xiangdong Meng, Min Zhou, Yuxue Zhou\*

*College of Physical Science and Technology, Yangzhou University, Yangzhou  
225002, China.*

E-mail: [yxzhou@yzu.edu.cn](mailto:yxzhou@yzu.edu.cn).

### Details of iR Compensation Procedure

The uncompensated resistance ( $R_u$ ) was measured by electrochemical impedance spectroscopy (EIS) at open circuit potential over a frequency range of 100 kHz to 0.1 Hz with an AC amplitude of 10 mV. The  $R_u$  value was obtained from the high-frequency intercept of the Nyquist plot with the real axis. To avoid risks associated with 100% real-time compensation, 90% automatic iR compensation was applied during all measurements.

For the  $\text{CoMoO}_4/\text{CeO}_2\text{-CP-0.5}$  electrode ( $1 \text{ cm}^2$ ), the measured  $R_u$  was approximately  $2.5 \Omega$ . Based on Ohm's law, the total ohmic drop at  $10 \text{ mA cm}^{-2}$  is 25 mV, and the 90% compensation corresponds to a correction of 22.5 mV. This theoretical value is in excellent agreement with the observed 22 mV shift between raw and compensated curves, confirming the accuracy of the compensation and ruling out over-compensation.

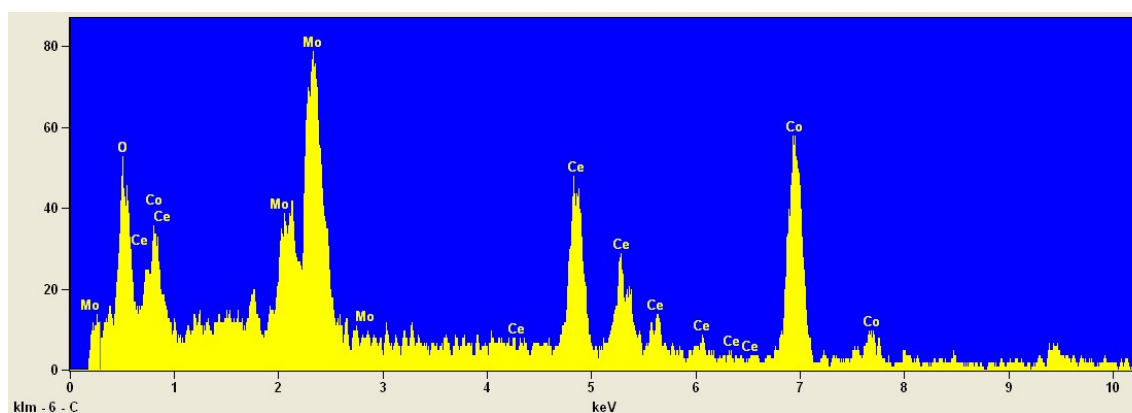

**Fig. S1.** EDX spectra of  $\text{CoMoO}_4/\text{CeO}_2\text{-CP-0.5}$  sample.

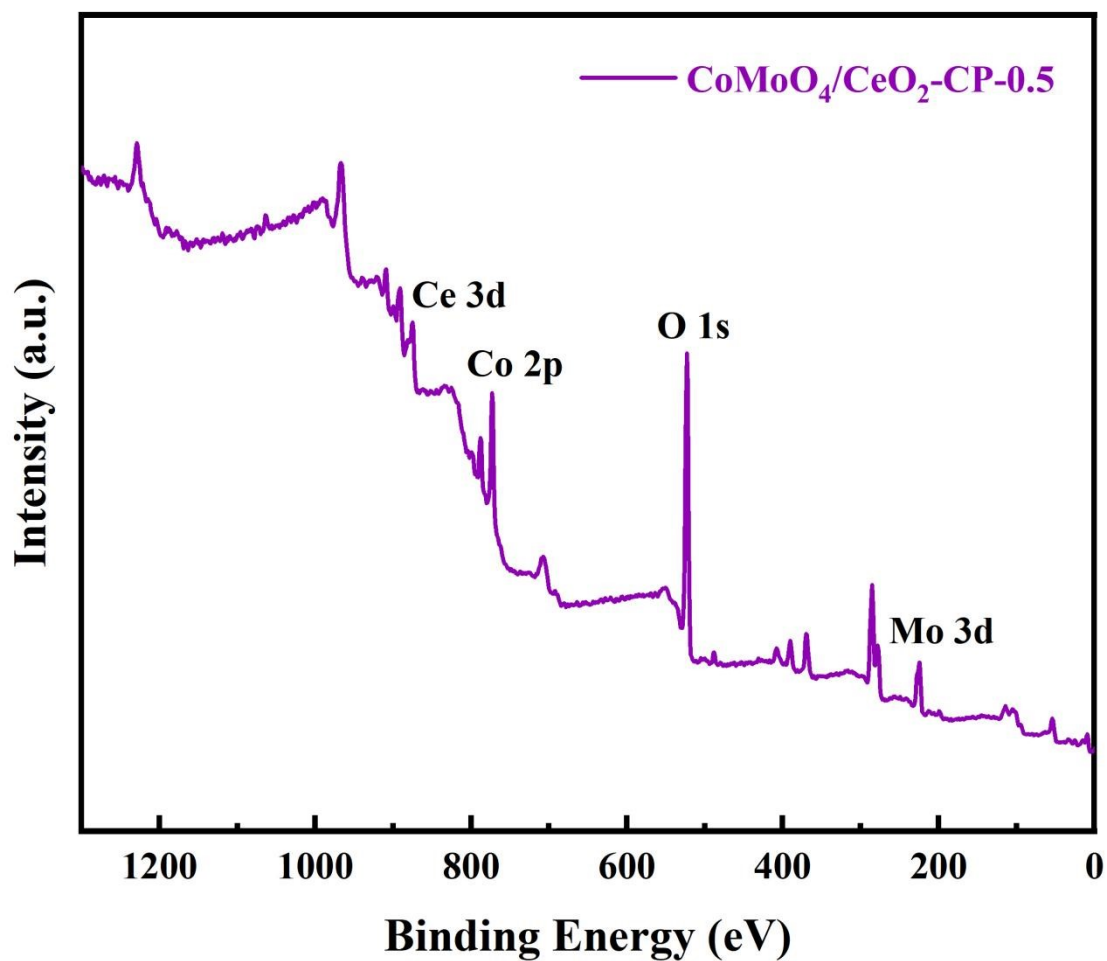

Fig. S2. XPS spectra of CoMoO<sub>4</sub>/CeO<sub>2</sub>-CP-0.5 catalyst.

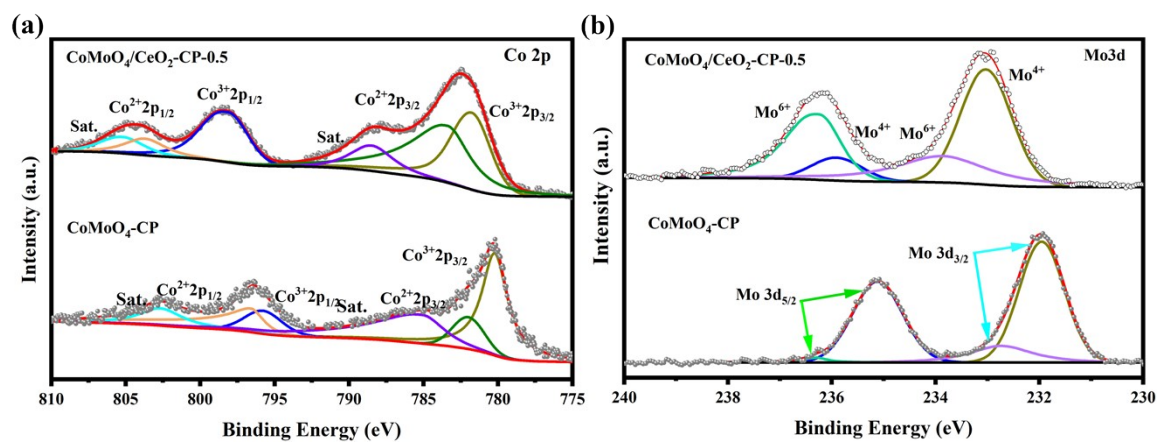

Fig. S3. (a) Co 2p XPS spectra for CoMoO<sub>4</sub>/CeO<sub>2</sub>-CP-0.5 and CoMoO<sub>4</sub>-CP; (b) Mo 3d XPS spectra for CoMoO<sub>4</sub>/CeO<sub>2</sub>-CP-0.5 and CoMoO<sub>4</sub>-CP.

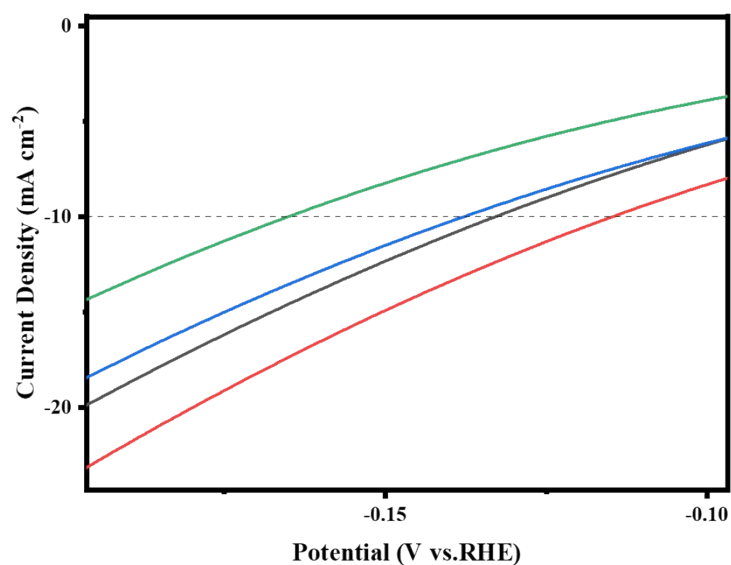

**Fig. S4.** HER activities of CoMoO<sub>4</sub>-CP, CoMoO<sub>4</sub>/CeO<sub>2</sub>-CP-0.5, CoMoO<sub>4</sub>/CeO<sub>2</sub>-CP-0.6 and CoMoO<sub>4</sub>/CeO<sub>2</sub>-CP-0.8 in 1.0 M KOH: LSV plots(Partial enlarged view)

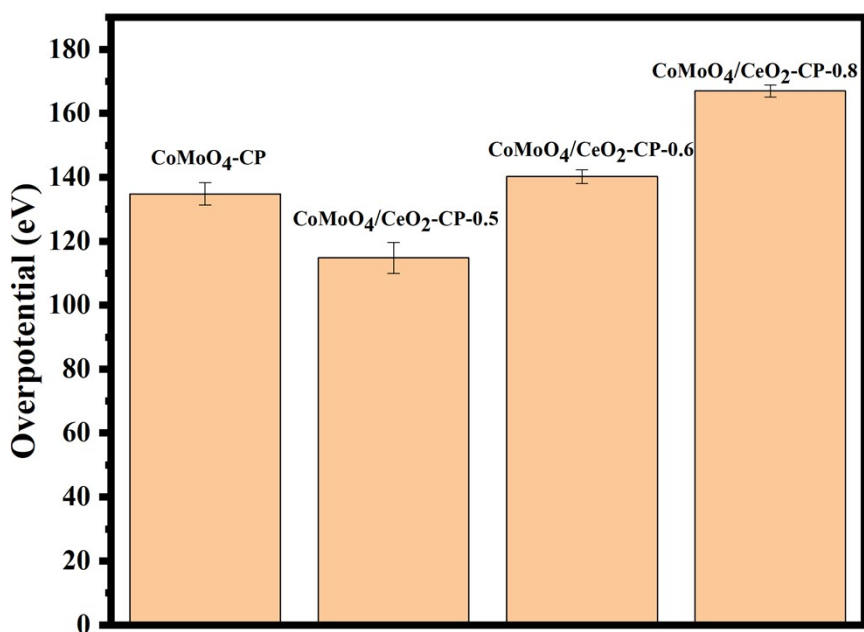

**Fig. S5.** Overpotentials at 10 mA cm<sup>-2</sup> for HER with error bars from triplicate measurements from CoMoO<sub>4</sub>-CP, CoMoO<sub>4</sub>/CeO<sub>2</sub>-CP-0.5, CoMoO<sub>4</sub>/CeO<sub>2</sub>-CP-0.6 and CoMoO<sub>4</sub>/CeO<sub>2</sub>-CP-0.8 in 1.0 M KOH, respectively.

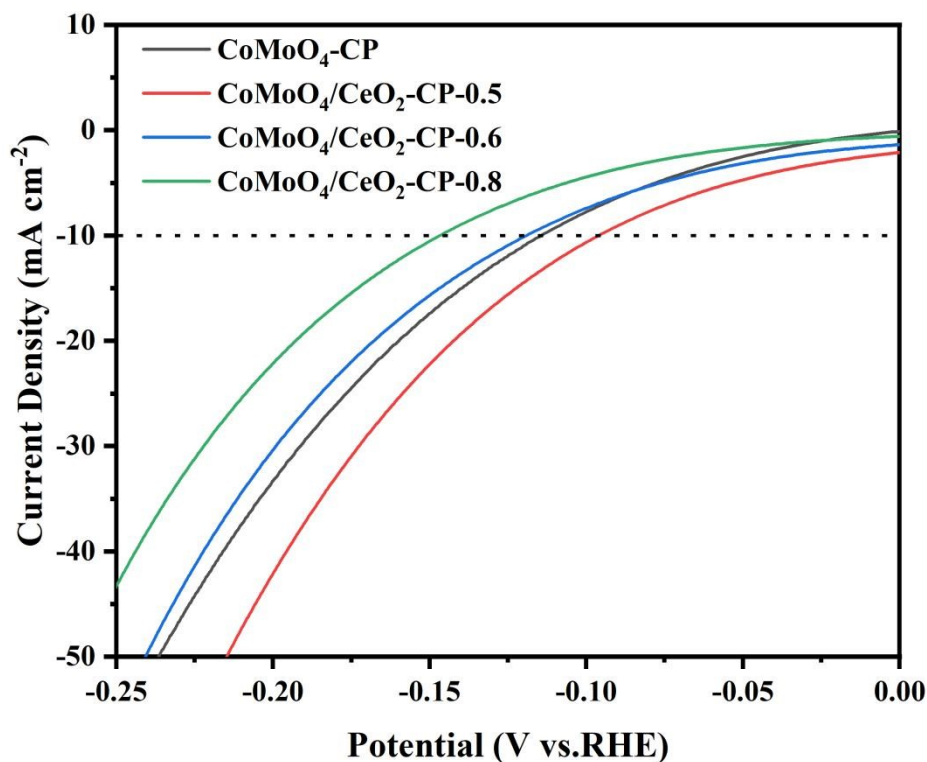

**Fig. S6.** iR-compensated HER polarization curves of CoMoO<sub>4</sub>, CoMoO<sub>4</sub>/CeO<sub>2</sub>-CP-0.5, CoMoO<sub>4</sub>/CeO<sub>2</sub>-CP-0.6 and CoMoO<sub>4</sub>/CeO<sub>2</sub>-CP-0.8, respectively.

**Table S1** Comparison of the HER performance of CoMoO<sub>4</sub>/CeO<sub>2</sub>-CP-0.5 at room temperature with other reported CeO<sub>2</sub>-decorated electrocatalysts.

| Catalyst                                                                        | Overpotential (mV@ mA/cm <sup>2</sup> ) | Reference |
|---------------------------------------------------------------------------------|-----------------------------------------|-----------|
| CoMoO <sub>4</sub> /CeO <sub>2</sub> -CP-0.5                                    | 114                                     | This work |
| Mn-O-Ce/NiP                                                                     | 120                                     | [1]       |
| CeO <sub>2</sub> /CuO                                                           | 245                                     | [2]       |
| CeO <sub>2</sub> /CuO/Co <sub>3</sub> O <sub>4</sub>                            | 110                                     | [3]       |
| CeO <sub>2</sub> -Y <sub>2</sub> O <sub>3</sub> -Nd <sub>2</sub> O <sub>3</sub> | 303                                     | [4]       |
| CeO <sub>2</sub> -CoP/NF                                                        | 124                                     | [5]       |
| Ni(OH) <sub>2</sub> -CeO <sub>2</sub>                                           | 207                                     | [6]       |
| CeO <sub>2</sub> @CoSe <sub>2</sub> /CC                                         | 138                                     | [11]      |

**Table S2** Fitting parameters of EIS for different electrodes(HER).

| Catalyst                                     | $R_s$ ( $\Omega$ ) | $R_{ct}$ ( $\Omega$ ) | CPE-T( $Fcm^{-2}$ ) | CPE-P |
|----------------------------------------------|--------------------|-----------------------|---------------------|-------|
| CoMoO <sub>4</sub> -CP                       | 2.115              | 8.533                 | 0.027               | 0.792 |
| CoMoO <sub>4</sub> /CeO <sub>2</sub> -CP-0.5 | 2.529              | 5.637                 | 0.047               | 0.874 |
| CoMoO <sub>4</sub> /CeO <sub>2</sub> -CP-0.6 | 2.060              | 6.327                 | 0.024               | 0.779 |
| CoMoO <sub>4</sub> /CeO <sub>2</sub> -CP-0.8 | 2.067              | 6.247                 | 0.029               | 0.781 |

**Table S3** Fitting parameters of EIS for different electrodes(OER).

| Catalyst                                     | $R_s$ ( $\Omega$ ) | $R_{ct}$ ( $\Omega$ ) | CPE-T( $Fcm^{-2}$ ) | CPE-P |
|----------------------------------------------|--------------------|-----------------------|---------------------|-------|
| CoMoO <sub>4</sub> -CP                       | 2.109              | 1.874                 | 0.191               | 0.826 |
| CoMoO <sub>4</sub> /CeO <sub>2</sub> -CP-0.5 | 2.493              | 1.550                 | 0.069               | 0.892 |
| CoMoO <sub>4</sub> /CeO <sub>2</sub> -CP-0.6 | 2.102              | 1.520                 | 0.284               | 0.812 |
| CoMoO <sub>4</sub> /CeO <sub>2</sub> -CP-0.8 | 2.065              | 1.784                 | 0.162               | 0.849 |

**Table S4** Comparison of the OER performance of CoMoO<sub>4</sub>/CeO<sub>2</sub>-CP-0.5 at room temperature with other reported CeO<sub>2</sub>-decorated electrocatalysts

| Catalyst                                               | Overpotential (mV@ mA/cm <sup>2</sup> ) | Reference |
|--------------------------------------------------------|-----------------------------------------|-----------|
| CoMoO <sub>4</sub> /CeO <sub>2</sub> -CP-0.5           | 305                                     | This work |
| CeO <sub>2</sub> /CuO                                  | 410                                     | [2]       |
| CeO <sub>2</sub> /CuO/Co <sub>3</sub> O <sub>4</sub>   | 520                                     | [3]       |
| RuO <sub>2</sub> /CeO <sub>2</sub>                     | 350                                     | [7]       |
| Ag-CeO <sub>2</sub> -Co <sub>3</sub> O <sub>4</sub> /C | 340                                     | [8]       |
| Ni/CeO <sub>2</sub>                                    | 335                                     | [9]       |
| NiS <sub>x</sub> /CeO <sub>2</sub> /NF                 | 326                                     | [10]      |

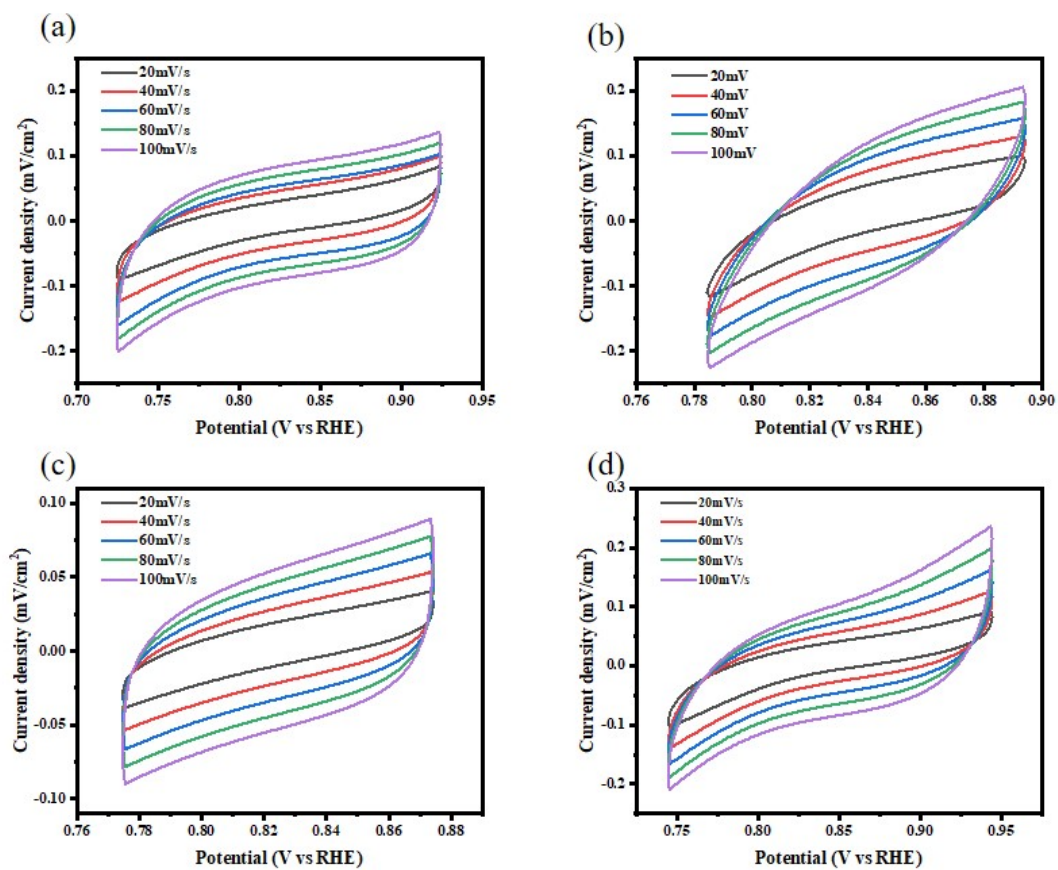

**Fig.S7.** HER activities: The cyclic voltammetry (CV) curves of (a) CoMoO<sub>4</sub>-CP, (b) CoMoO<sub>4</sub>/CeO<sub>2</sub>-CP-0.5, (c) CoMoO<sub>4</sub>/CeO<sub>2</sub>-CP-0.6, (d) CoMoO<sub>4</sub>/CeO<sub>2</sub>-CP-0.8 at various scan rates for the calculation of electrochemical double-layer capacitances.

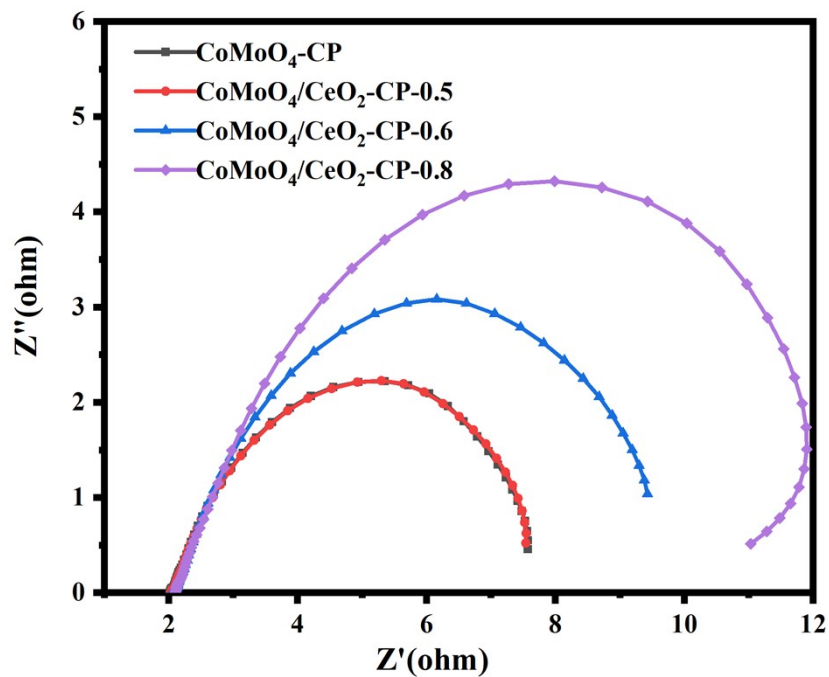

**Fig. S8.** EIS raw data from CoMoO<sub>4</sub>-CP, CoMoO<sub>4</sub>/CeO<sub>2</sub>-CP-0.5, CoMoO<sub>4</sub>/CeO<sub>2</sub>-CP-0.6 and CoMoO<sub>4</sub>/CeO<sub>2</sub>-CP-0.8, respectively (HER).

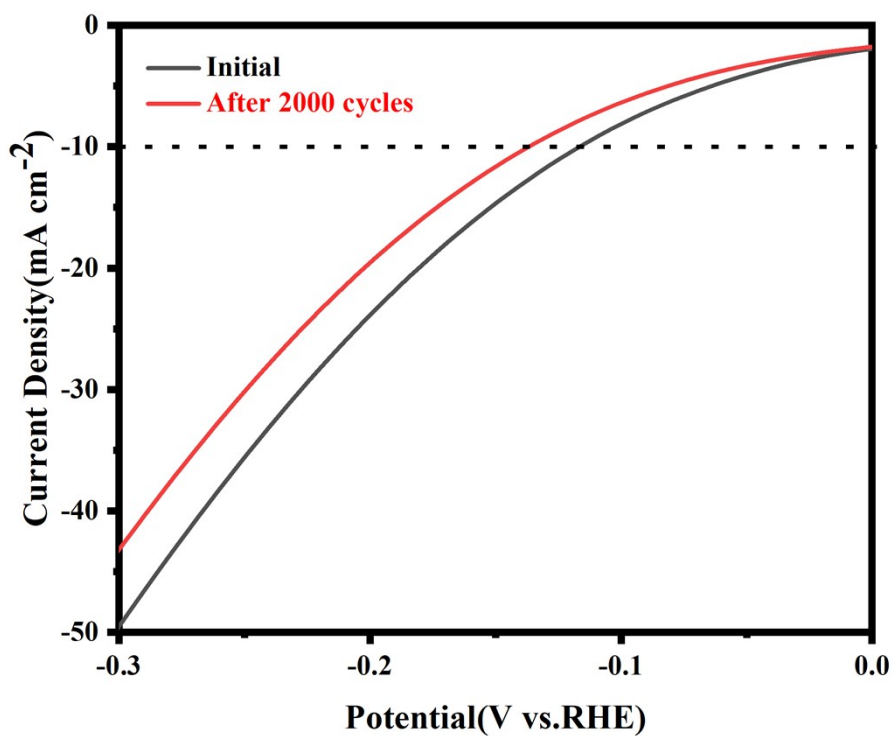

**Fig. S9.** Chronopotentiometric measurement of CoMoO<sub>4</sub>/CeO<sub>2</sub>-CP-0.5.

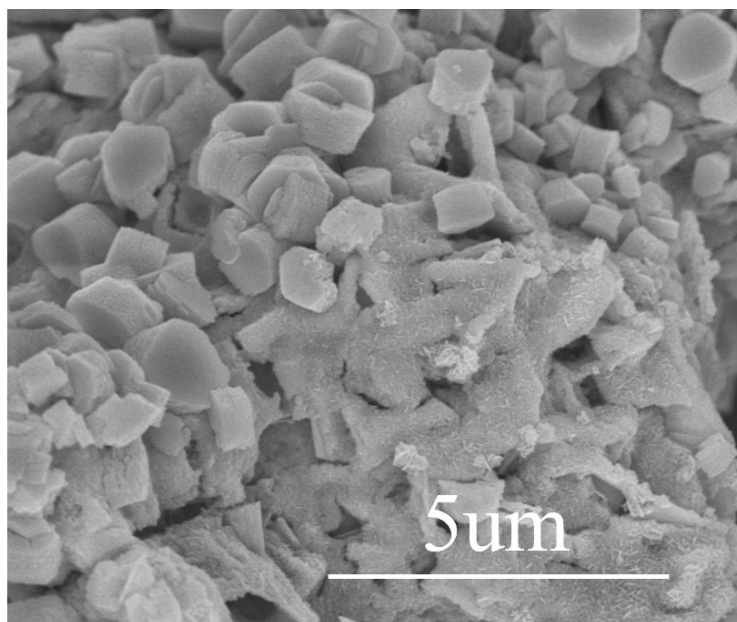

Fig. S10. SEM image of the CoMoO<sub>4</sub>/CeO<sub>2</sub>-CP-0.5 catalyst after long-term HER reaction

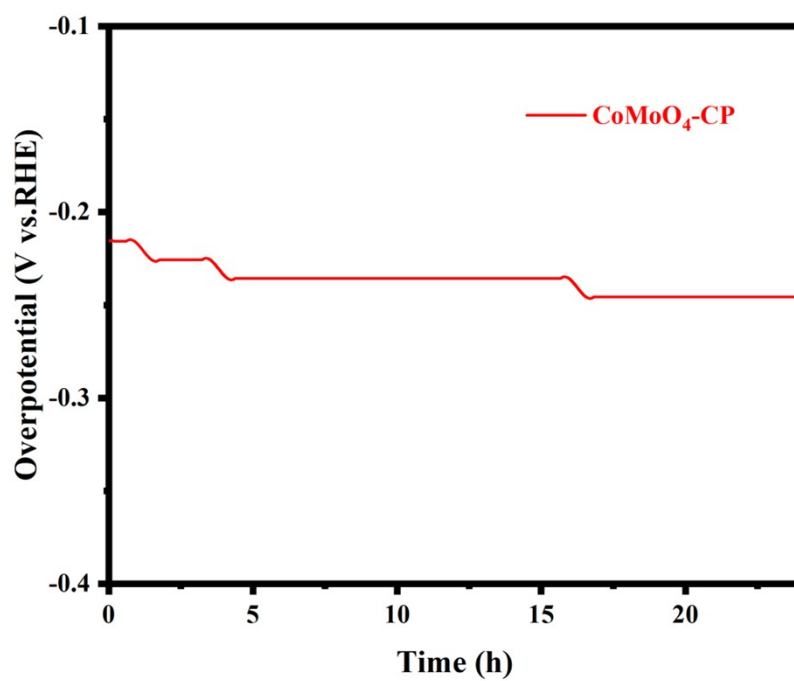

Fig. S11. Chronopotentiometric measurement of CoMoO<sub>4</sub>-CP.

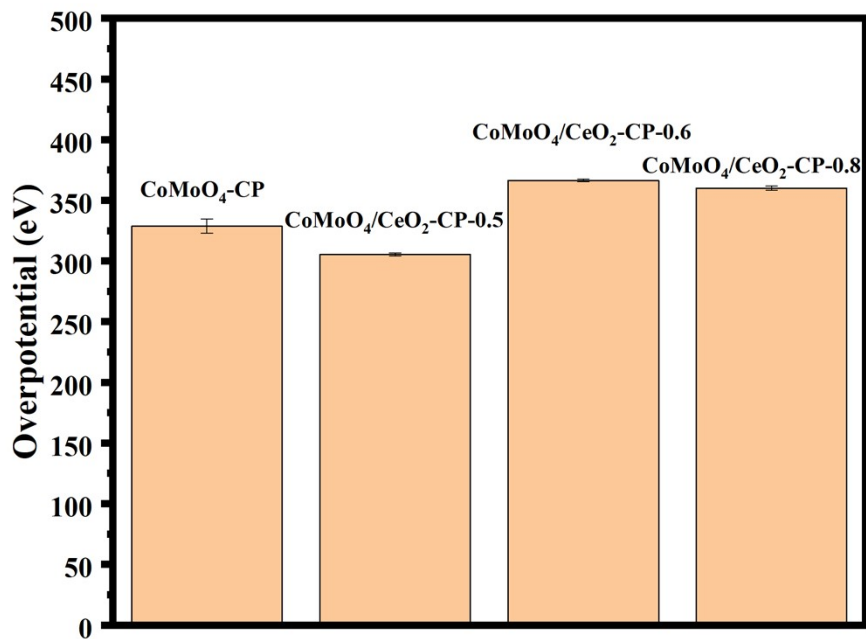

**Fig. S12.** Overpotentials at 10 mA cm<sup>-2</sup> for OER with error bars from triplicate measurements from CoMoO<sub>4</sub>-CP, CoMoO<sub>4</sub>/CeO<sub>2</sub>-CP-0.5, CoMoO<sub>4</sub>/CeO<sub>2</sub>-CP-0.6 and CoMoO<sub>4</sub>/CeO<sub>2</sub>-CP-0.8 in 1.0 M KOH, respectively.

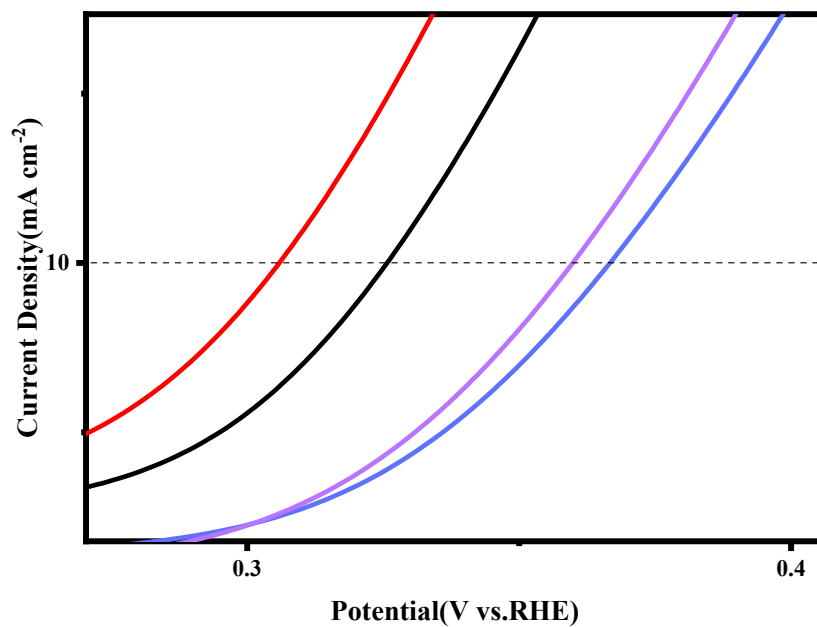

**Fig. S13.** OER activities of CoMoO<sub>4</sub>-CP, CoMoO<sub>4</sub>/CeO<sub>2</sub>-CP-0.5, CoMoO<sub>4</sub>/CeO<sub>2</sub>-CP-0.6 and CoMoO<sub>4</sub>/CeO<sub>2</sub>-CP-0.8 in 1.0 M KOH: LSV plots (Partial enlarged view)

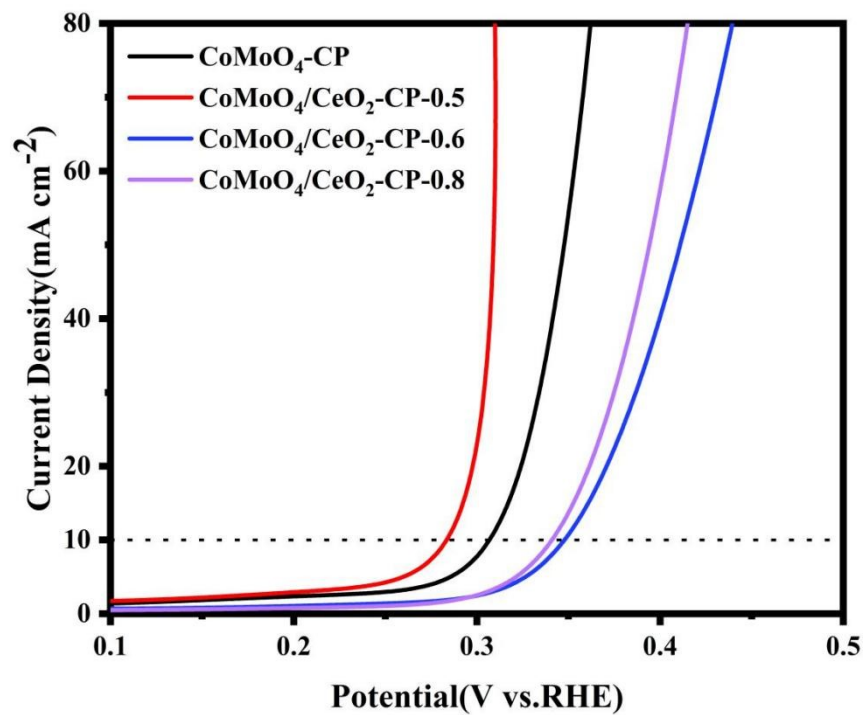

**Fig. S14.** iR-compensated OER polarization curves CoMoO<sub>4</sub>, CoMoO<sub>4</sub>/CeO<sub>2</sub>-CP-0.5, CoMoO<sub>4</sub>/CeO<sub>2</sub>-CP-0.6 and CoMoO<sub>4</sub>/CeO<sub>2</sub>-CP-0.8, respectively.

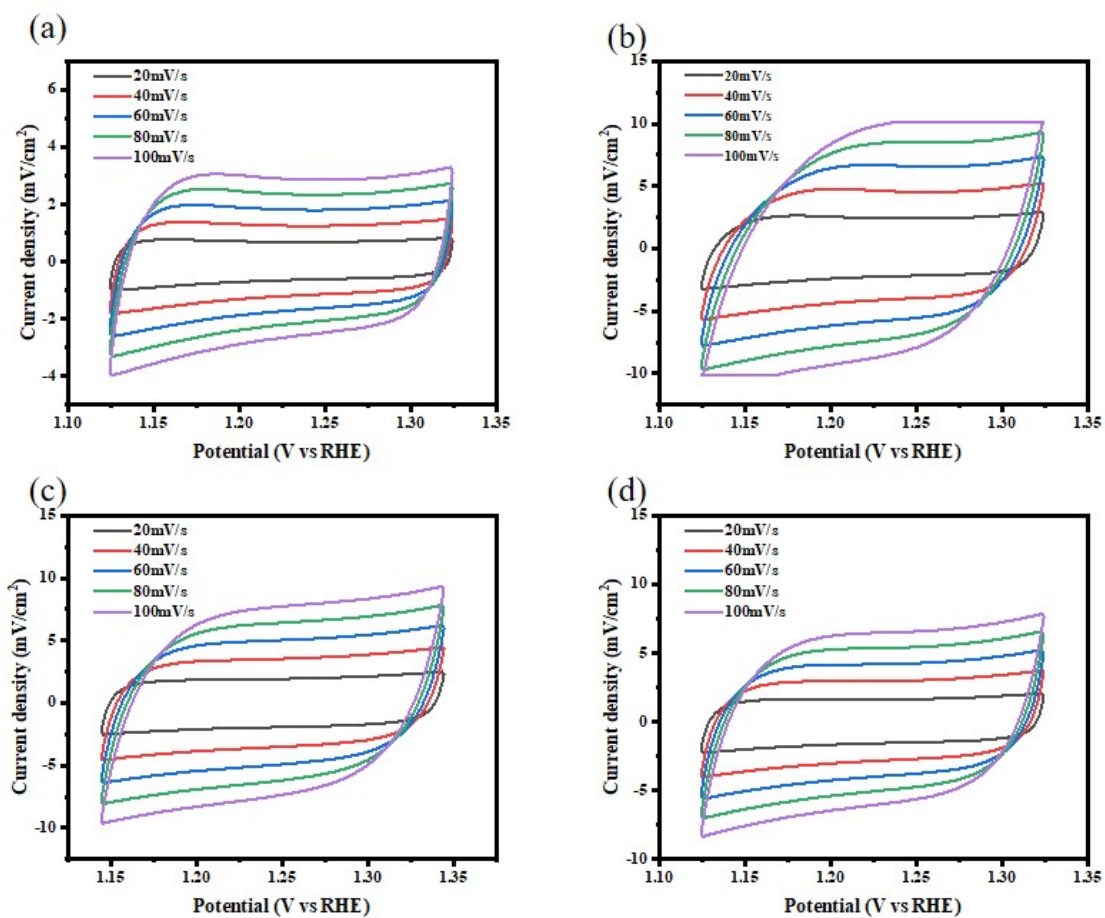

**Fig.S15.** OER activities: The cyclic voltammety (CV) curves of (a)  $\text{CoMoO}_4\text{-CP}$ , (b)  $\text{CoMoO}_4/\text{CeO}_2\text{-CP-0.5}$ , (c)  $\text{CoMoO}_4/\text{CeO}_2\text{-CP-0.6}$ , (d)  $\text{CoMoO}_4/\text{CeO}_2\text{-CP-0.8}$  at various scan rates for the calculation of electrochemical double-layer capacitances.

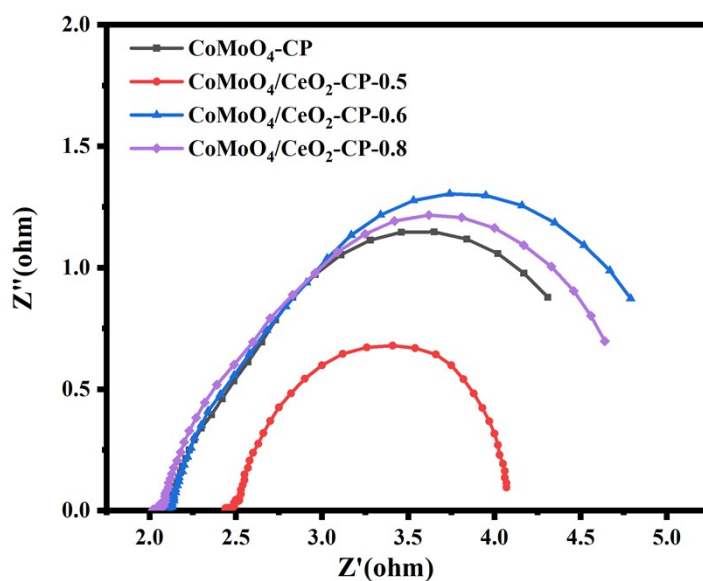

**Figure S16.** EIS raw data from  $\text{CoMoO}_4\text{-CP}$ ,  $\text{CoMoO}_4/\text{CeO}_2\text{-CP-0.5}$ ,  $\text{CoMoO}_4/\text{CeO}_2\text{-CP-0.6}$  and  $\text{CoMoO}_4/\text{CeO}_2\text{-CP-0.8}$ , respectively (OER).

- [1]. Remadevi T, Rajan A, Muhammed A, et al. Mn–Ce modified NiP electrocatalysts for HER: A combined computational and electrochemical study[J]. *International Journal of Hydrogen Energy*, 2025, 148: 150068.
- [2]. Ghosh D, Pradhan D. Effect of cooperative redox property and oxygen vacancies on bifunctional OER and HER activities of solvothermally synthesized CeO<sub>2</sub>/CuO composites[J]. *Langmuir*, 2023, 39(9): 3358-3370.
- [3]. Shaghghi Z, Jafari S, Mohammad-Rezaei R. The heterostructure of ceria and hybrid transition metal oxides with high electrocatalytic performance for water splitting and enzyme-free glucose detection[J]. *Journal of Electroanalytical Chemistry*, 2022, 915: 116369.
- [4]. Shaghghi Z, Jafari S, Mohammad-Rezaei R. The heterostructure of ceria and hybrid transition metal oxides with high electrocatalytic performance for water splitting and enzyme-free glucose detection[J]. *Journal of Electroanalytical Chemistry*, 2022, 915: 116369.
- [5]. Qiu W J, Hu Z, Zhou Q H, et al. Rare earth cerium oxide reinforced cobalt based catalysts for electrolysed water and their properties[J]. *Acta Materialiae Compositae Sinica*, 2024, 41: 804.
- [6]. Xiang D, Qin Z, Gan Y, et al. Interfacial charge density modulation by coupling CeO<sub>2</sub> with dual-phase NiS/Ni<sub>3</sub>S<sub>2</sub> to accelerate alkaline water splitting[J]. *Materials Today Chemistry*, 2023, 34: 101791.
- [7]. Galani S M, Mondal A, Srivastava D N, et al. Development of RuO<sub>2</sub>/CeO<sub>2</sub> heterostructure as an efficient OER electrocatalyst for alkaline water splitting[J]. *International Journal of Hydrogen Energy*, 2020, 45(37): 18635-18644.
- [8]. Li T, He Z, Liu X, et al. Interface interaction of Ag-CeO<sub>2</sub>-Co<sub>3</sub>O<sub>4</sub> facilitate ORR/OER activity for Zn-air battery[J]. *Surfaces and Interfaces*, 2022, 33: 102270.
- [9]. Gunarasan J P C, Lee J W. Superaerophobic 0D nickel–2D ceria supported 316L for enhanced OER and HER activity[J]. *Surface and Coatings Technology*, 2025, 507: 132143.

- [10]. Zhang X, Liu F, Ji X, et al. Facile generation of CeO<sub>2</sub> nanoparticles on multiphased NiS<sub>x</sub> nanoplatelet arrays as a free-standing electrode for efficient overall water splitting[J]. *Journal of Colloid and Interface Science*, 2024, 653: 308-315.
- [11]. Guo Q, Li Y, Xu Z, et al. CeO<sub>2</sub>-accelerated surface reconstruction of CoSe<sub>2</sub> nanoneedle forms active CeO<sub>2</sub>@ CoOOH interface to boost oxygen evolution reaction for water splitting[J]. *Advanced Energy Materials*, 2025, 15(4): 2403744.
- [12]. Jiang W, Li H, Chen Y, et al. OER properties of Ni–Co–CeO<sub>2</sub>/Ni composite electrode prepared by magnetically induced jet electrodeposition[J]. *International Journal of Hydrogen Energy*, 2023, 48(11): 4287-4299.
